# Supplementary material
Source: publisher figshare collection journal article supplement (https://acs.figshare.com/ndownloader/files/4175365)

# On extension of the current biomolecular empirical force field for the description of halogen bonds

Michal Kolář<sup>1,2</sup> and Pavel Hobza<sup>1,3,4\*</sup>

<sup>1</sup>Institute of Organic Chemistry and Biochemistry and Gilead Science Research Center, Academy of Sciences of the Czech Republic, Flemingovo nám. 2, 166 10 Prague 6, The Czech Republic, tel.: (+420) 220 410311, email: [pavel.hobza@uochb.cas.cz](mailto:pavel.hobza@uochb.cas.cz)

<sup>2</sup>Department of Physical and Macromolecular Chemistry, Faculty of Science, Charles University in Prague, Albertov 6, 128 43 Prague 2

<sup>3</sup>Regional Center of Advanced Technologies and Materials, Department of Physical Chemistry, Palacký University, Olomouc, 771 46 Olomouc, The Czech Republic

<sup>4</sup>Department of Chemistry, Pohang University of Science and Technology, San 31, Hyojadong, Namgu, Pohang 790-784, Republic of Korea

**Supplementary Information**

**Table S1:** CCSD(T)/CBS interaction energies  $E_{\text{int}}$  of the complexes.

| Filename      | Br...Y distance [Å] | $E_{\text{int}}$ [kcal/mol] |
|---------------|---------------------|-----------------------------|
| br2f_o_25.xyz | 2.5                 | 0.45                        |
| br2f_o_27.xyz | 2.7                 | -2.13                       |
| br2f_o_29.xyz | 2.9                 | -2.95                       |
| br2f_o_31.xyz | 3.1                 | -2.96                       |
| br2f_o_33.xyz | 3.3                 | -2.65                       |
| br2f_o_35.xyz | 3.5                 | -2.24                       |
| br2f_o_40.xyz | 4.0                 | -1.34                       |
| br2f_o_45.xyz | 4.5                 | -0.78                       |
| br2f_o_60.xyz | 6.0                 | -0.19                       |
| br2f_o_70.xyz | 7.0                 | -0.09                       |
| br_o_27.xyz   | 2.7                 | -1.10                       |
| br_o_29.xyz   | 2.9                 | -2.22                       |
| br_o_31.xyz   | 3.1                 | -2.42                       |
| br_o_33.xyz   | 3.3                 | -2.23                       |
| br_o_35.xyz   | 3.5                 | -1.91                       |
| br_o_40.xyz   | 4.0                 | -1.10                       |
| br_o_45.xyz   | 4.5                 | -0.59                       |
| br_o_60.xyz   | 6.0                 | -0.07                       |
| br_o_70.xyz   | 7.0                 | 0.00                        |
| br_n_25.xyz   | 2.5                 | 0.11                        |
| br_n_27.xyz   | 2.7                 | -2.74                       |
| br_n_29.xyz   | 2.9                 | -3.62                       |
| br_n_31.xyz   | 3.1                 | -3.57                       |
| br_n_33.xyz   | 3.3                 | -3.15                       |
| br_n_35.xyz   | 3.5                 | -2.62                       |
| br_n_45.xyz   | 4.5                 | -0.78                       |
| br_n_60.xyz   | 6.0                 | -0.12                       |

**Figure S1:** Error analysis of the gas phase dissociation curves of 1-bromo-3,5-difluorobenzene...acetone complex (Br2F<sub>2</sub>O). Mean unsigned absolute errors (MUAE) are plotted in green and mean unsigned relative errors (MURE) are in grey. Two charge sets are compared: RESP charges based on B3LYP/cc-ptvz electrostatic potential grid and on HF/6-31G\* electrostatic potential grid. Three explicit sigma-hole construction schemes are shown: two-parameter models nF and rF, and one-parameter model aF. Note the different color ranges of the plots.

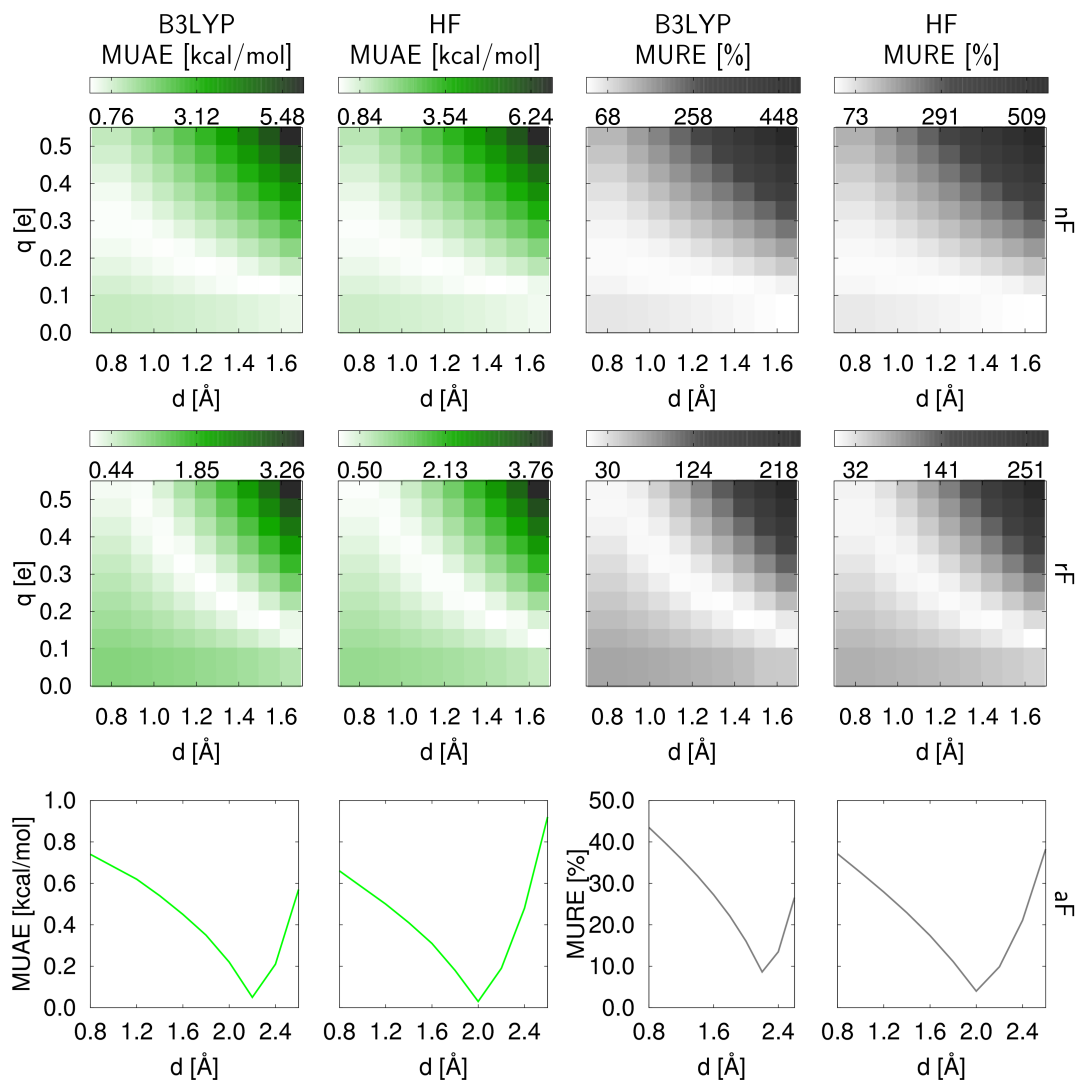

**Figure S2:** Error analysis of the gas phase dissociation curves of bromobenzene...acetone complex (Br<sub>2</sub>O). Mean unsigned absolute errors (MUAE) are plotted in green and mean unsigned relative errors (MURE) are in grey. Two charge sets are compared: RESP charges based on B3LYP/cc-ptvz electrostatic potential grid and on HF/6-31G\* electrostatic potential grid. Three explicit sigma-hole construction schemes are shown: two-parameter models nF and rF, and one-parameter model aF. Note the different color ranges of the plots.

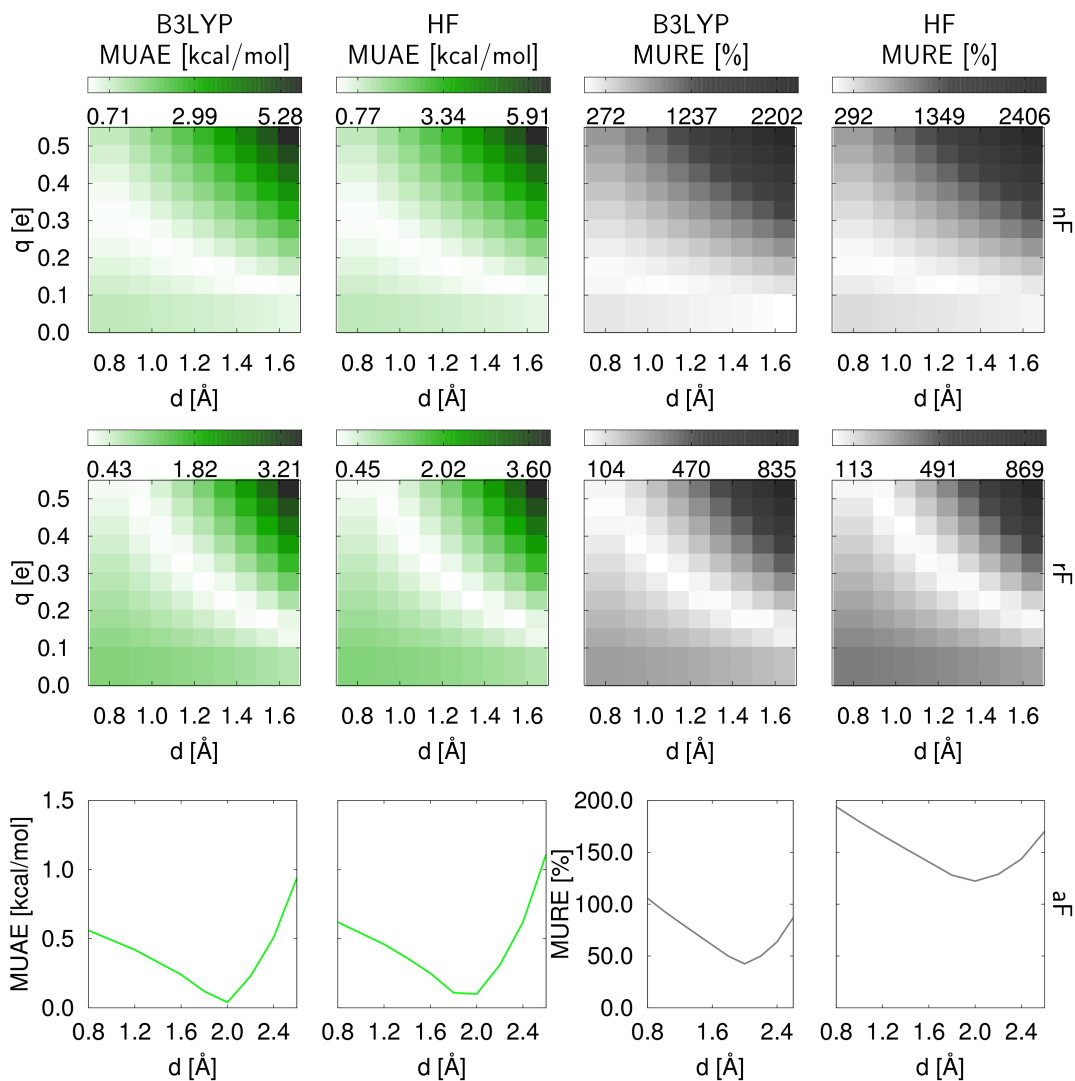

**Figure S3:** Error analysis of the gas phase dissociation curves of bromobenzene...trimethylammonia complex (Br<sub>N</sub>). Mean unsigned absolute errors (MUAE) are plotted in green and mean unsigned relative errors (MURE) are in grey. Two charge sets are compared: RESP charges based on B3LYP/cc-ptvz electrostatic potential grid and on HF/6-31G\* electrostatic potential grid. Three explicit sigma-hole construction schemes are shown: two-parameter models nF and rF, and one-parameter model aF. Note the different color ranges of the plots.

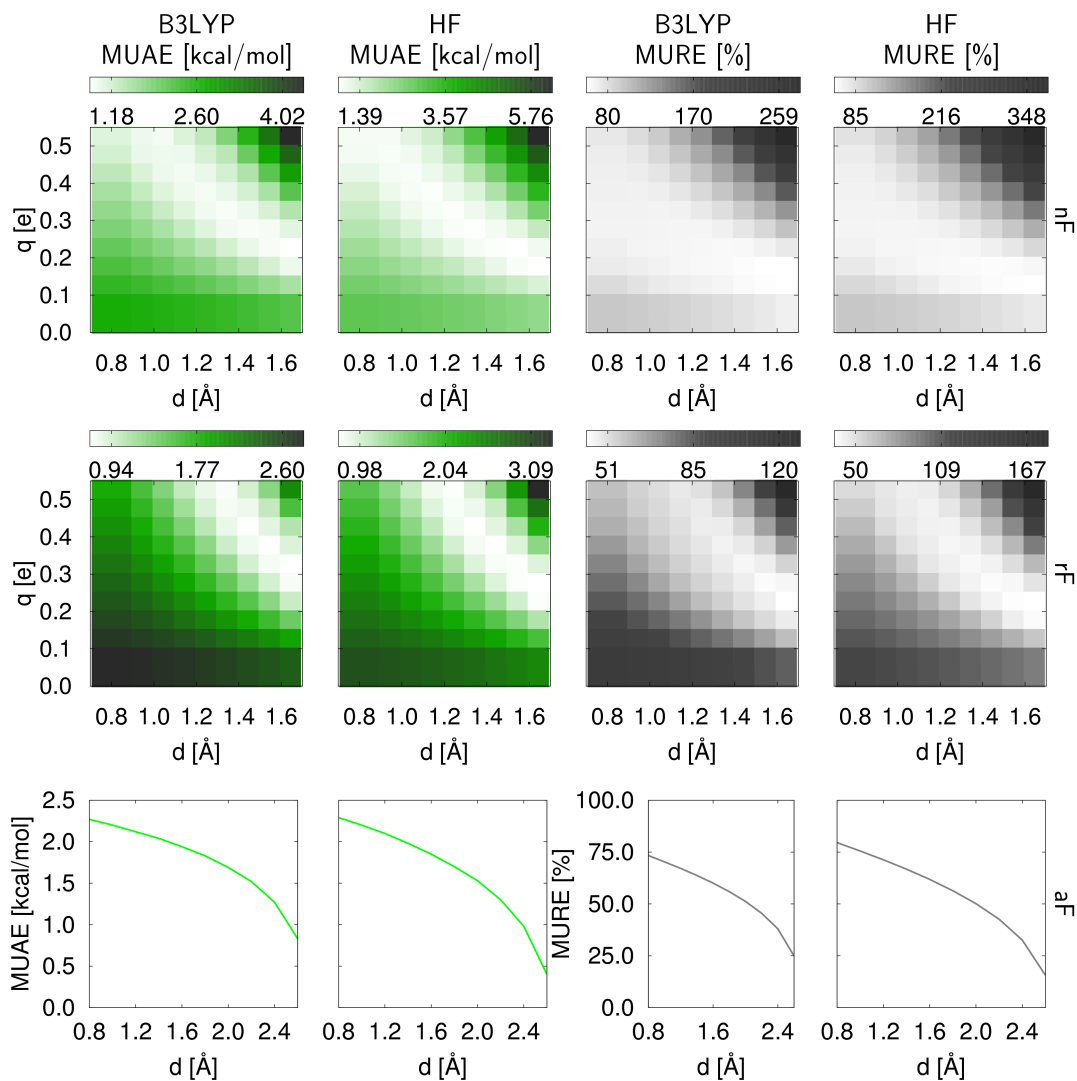

**Figure S4:** Root mean square deviations (RMSD) with respect to the X-ray geometry. PDB codes were calculated for seven casein kinase 2 inhibitors. Three explicit sigma-hole construction schemes are shown: two-parameter models nF and rF, and one-parameter model aF. Note the different color ranges of the plots.

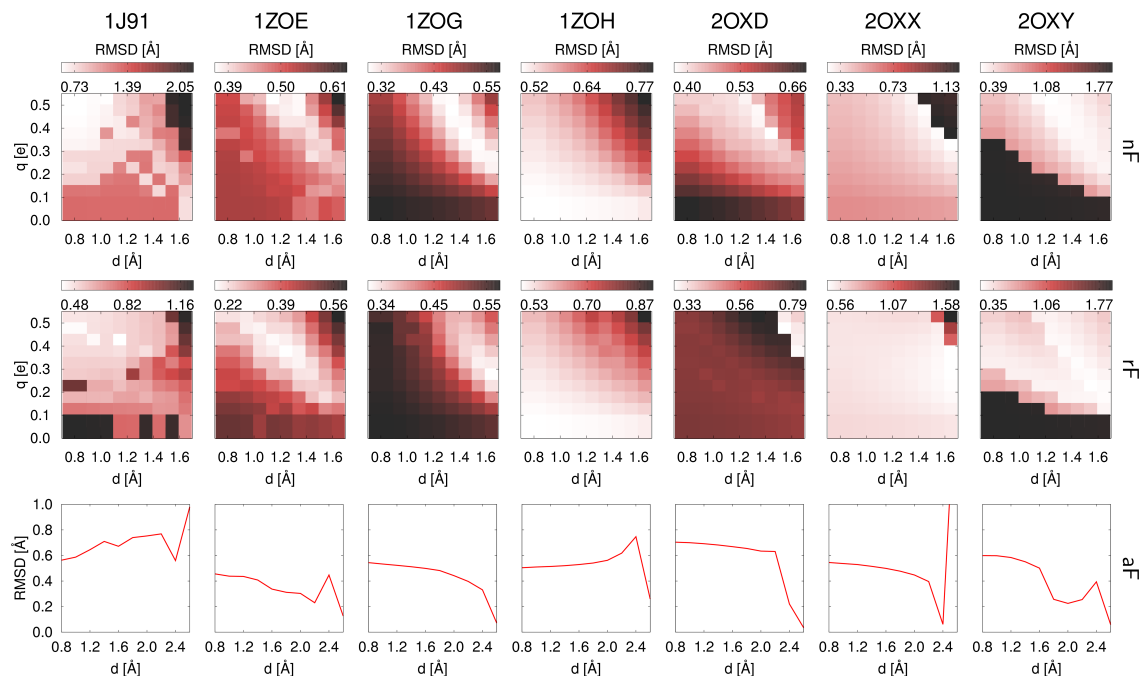

**Figure S5:** Root mean square deviations (RMSD) with respect to the X-ray geometry. PDB codes were calculated for the active sites of seven casein kinase 2 complexes. Three explicit sigma-hole construction schemes are shown: two-parameter models nF and rF, and one-parameter model aF. Note the different color ranges of the plots.

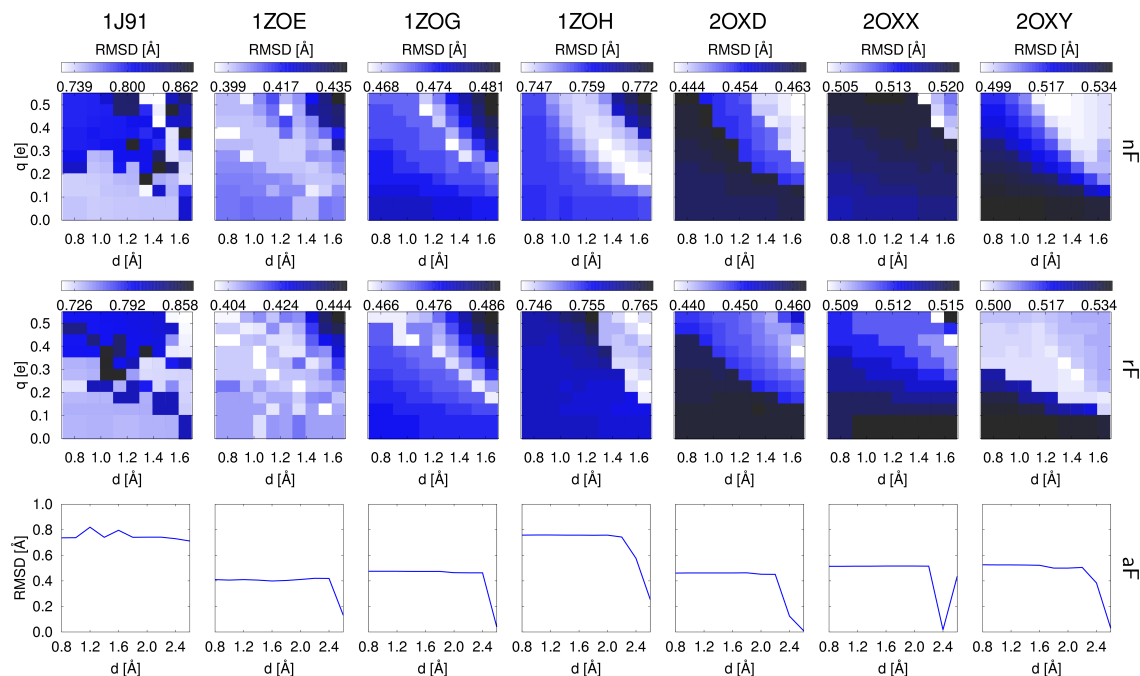

**Figure S6:** Number of contacts between inhibitor bromines and protein oxygen atoms (xbs). The results for three explicit sigma-hole (ESH) construction schemes are shown: two-parameter models nF and rF, and one-parameter model aF. For comparison, the number of bromine-oxygen contacts in experimental X-ray structure (X-ray) and force field without ESH (noESH) are provided as the insets of the last row plots.

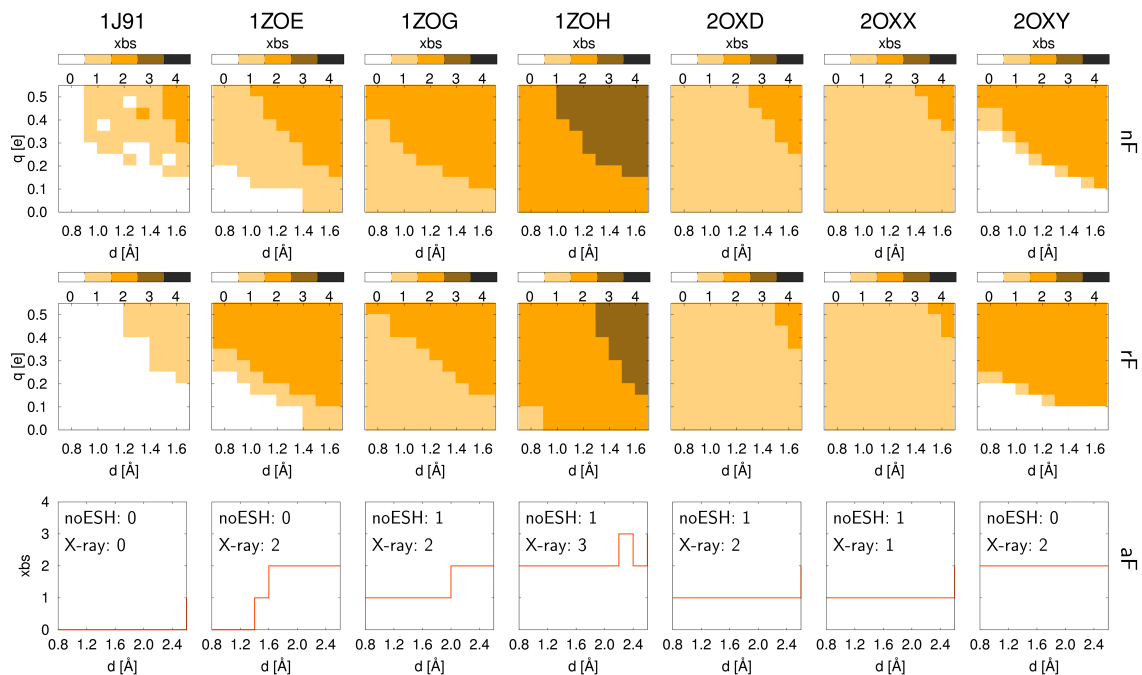

Supplement: Supplementary file 1 [file 4175365]
